# Supplementary material for: Repeated craniotomies for intracranial tumors: is the risk increased? Pooled analysis of two prospective, institutional registries of complications and outcomes
Source: PubMed Central journal article supplement (PMC6399174; doi:10.1007/s11060-018-03058-y), 2018-11-24
Supplement: 11060_2018_3058_MOESM3_ESM.pdf [file 11060_2018_3058_MOESM3_ESM.pdf]

**Online Resource 2:** Subgroup analysis on patients undergoing microsurgical resection of an intracranial meningioma. The data is based on 664 patients, of which 85 underwent repeated surgery.

Logistic regression analysis estimating the relationship between repeated microsurgical resection of an intracranial meningioma and morbidity three months after surgery. The multivariate analysis is adjusted for baseline differences in age, sex, size and posterior fossa location of the tumor.

| M3 morbidity                          | Univariate analysis |             |         | Multivariate analysis |             |         |
|---------------------------------------|---------------------|-------------|---------|-----------------------|-------------|---------|
|                                       | OR                  | 95% CI      | p-value | OR                    | 95% CI      | p-value |
| Repeated surgery                      | 0.63                | 0.19 – 2.09 | 0.446   | 0.70                  | 0.20 – 2.41 | 0.574   |
| Age (per year)                        | -                   | -           | -       | 1.01                  | 0.99 – 1.05 | 0.294   |
| Male sex                              | -                   | -           | -       | 1.92                  | 0.93 – 3.98 | 0.078   |
| Tumor size (per increase in category) | -                   | -           | -       | 1.74                  | 0.92 – 3.31 | 0.090   |
| Posterior fossa location              | -                   | -           | -       | 3.30                  | 1.58 – 6.89 | 0.001   |

Logistic regression analysis estimating the relationship between repeated microsurgical resection of an intracranial meningioma and morbidity at time of hospital discharge. The multivariate analysis is adjusted for baseline differences in age, sex, size and posterior fossa location of the tumor.

| Discharge morbidity                   | Univariate analysis |             |         | Multivariate analysis |             |         |
|---------------------------------------|---------------------|-------------|---------|-----------------------|-------------|---------|
|                                       | OR                  | 95% CI      | p-value | OR                    | 95% CI      | p-value |
| Repeated surgery                      | 1.05                | 0.48 – 2.30 | 0.897   | 1.20                  | 0.54 – 2.68 | 0.657   |
| Age (per year)                        | -                   | -           | -       | 1.01                  | 0.99 – 1.03 | 0.593   |
| Male sex                              | -                   | -           | -       | 1.52                  | 0.85 – 2.71 | 0.159   |
| Tumor size (per increase in category) | -                   | -           | -       | 1.75                  | 1.06 – 2.89 | 0.027   |
| Posterior fossa location              | -                   | -           | -       | 2.81                  | 1.56 – 5.07 | 0.001   |

As there was no 3-month mortality in patients undergoing repeated microsurgical resection of an intracranial meningioma, logistic regression analysis estimating the relationship between repeated surgery and mortality could not be calculated.

This online supplementary document is part of the article “Repeated craniotomies for intracranial tumors: is the risk increased? Pooled analysis of two prospective, institutional registries of complications and outcomes” by Costanza Maria Zattra<sup>1,2</sup>, MD; David Y. Zhang<sup>1</sup>, MSc; Morgan Broggi<sup>2</sup>, MD, PhD; Julia Velz<sup>1</sup>, MD; Flavio Vasella<sup>1</sup>, MD; Dominik Seggewiss<sup>1</sup>, MD; Silvia Schiavolin<sup>3</sup>, PsyD; Oliver Bozinov<sup>1</sup>, MD; Niklaus Kraysenbühl<sup>1</sup>, MD; Johannes Sarnthein<sup>1</sup>, PhD; Paolo Ferroli<sup>2</sup>, MD; Luca Regli<sup>1</sup>, MD; Martin N. Stienen<sup>1</sup>, MD, FEBNS

<sup>1</sup>Department of Neurosurgery, University Hospital Zurich and Clinical Neuroscience Center, University of Zurich, Frauenklinikstrasse 10, 8091 Zurich, Switzerland

<sup>2</sup>Neurosurgical Unit 2, Department of Neurosurgery, Fondazione IRCCS Istituto Neurologico Carlo Besta, Milan, Italy

<sup>3</sup>Public Health and Disability Unit, Department of Neurology, Fondazione IRCCS Istituto Neurologico Carlo Besta, Milan, Italy

**Correspondence to:**

Martin N. Stienen, MD / FEBNS

Department of Neurosurgery

University Hospital Zurich & Clinical Neuroscience Center

University of Zurich

Frauenklinikstrasse 10

8091 Zurich, Switzerland

Tel: +41 – (0)44 – 255 – 1111

Email: [mnstienen@gmail.com](mailto:mnstienen@gmail.com)
