# Supplementary material for: Repeated craniotomies for intracranial tumors: is the risk increased? Pooled analysis of two prospective, institutional registries of complications and outcomes
Source: PubMed Central journal article supplement (PMC6399174; doi:10.1007/s11060-018-03058-y), 2018-11-24
Supplement: 11060_2018_3058_MOESM4_ESM.pdf [file 11060_2018_3058_MOESM4_ESM.pdf]

**Online Resource 3:** Subgroup analysis on patients undergoing microsurgical resection of a high- or low-grade glioma. The data is based on 849 patients, of which 220 underwent repeated surgery.

Logistic regression analysis estimating the relationship between repeated microsurgical resection of a high- or low-grade glioma and morbidity three months after surgery. The multivariate analysis is adjusted for baseline differences in age, sex, size and posterior fossa location of the tumor.

| M3 morbidity                          | Univariate analysis |             |         | Multivariate analysis |             |         |
|---------------------------------------|---------------------|-------------|---------|-----------------------|-------------|---------|
|                                       | OR                  | 95% CI      | p-value | OR                    | 95% CI      | p-value |
| Repeated surgery                      | 0.89                | 0.59 – 1.35 | 0.592   | 1.42                  | 0.91 – 2.23 | 0.125   |
| Age (per year)                        | -                   | -           | -       | 1.04                  | 1.02 – 1.05 | <0.001  |
| Male sex                              | -                   | -           | -       | 0.93                  | 0.63 – 1.37 | 0.708   |
| Tumor size (per increase in category) | -                   | -           | -       | 2.00                  | 1.41 – 2.85 | <0.001  |
| Posterior fossa location              | -                   | -           | -       | 2.44                  | 1.07 – 5.60 | 0.035   |

Logistic regression analysis estimating the relationship between repeated microsurgical resection of a high- or low-grade glioma and morbidity at time of hospital discharge. The multivariate analysis is adjusted for baseline differences in age, sex, size and posterior fossa location of the tumor.

| Discharge morbidity                   | Univariate analysis |             |         | Multivariate analysis |             |         |
|---------------------------------------|---------------------|-------------|---------|-----------------------|-------------|---------|
|                                       | OR                  | 95% CI      | p-value | OR                    | 95% CI      | p-value |
| Repeated surgery                      | 0.73                | 0.46 – 1.15 | 0.175   | 0.89                  | 0.55 – 1.44 | 0.625   |
| Age (per year)                        | -                   | -           | -       | 1.01                  | 1.00 – 1.03 | 0.027   |
| Male sex                              | -                   | -           | -       | 1.16                  | 0.77 – 1.75 | 0.481   |
| Tumor size (per increase in category) | -                   | -           | -       | 1.55                  | 1.08 – 2.21 | 0.017   |
| Posterior fossa location              | -                   | -           | -       | 1.23                  | 0.51 – 2.93 | 0.645   |

Logistic regression analysis estimating the relationship between repeated microsurgical resection of a high- or low-grade glioma and mortality three months after surgery. The multivariate analysis is adjusted for baseline differences in age, sex, size and posterior fossa location of the tumor.

| M3 mortality                          | Univariate analysis |             |         | Multivariate analysis |             |         |
|---------------------------------------|---------------------|-------------|---------|-----------------------|-------------|---------|
|                                       | OR                  | 95% CI      | p-value | OR                    | 95% CI      | p-value |
| Repeated surgery                      | 1.45                | 0.71 – 2.96 | 0.302   | 2.95                  | 1.35 – 6.45 | 0.007   |
| Age (per year)                        | -                   | -           | -       | 1.06                  | 1.03 – 1.08 | <0.001  |
| Male sex                              | -                   | -           | -       | 0.69                  | 0.34 – 1.40 | 0.708   |
| Tumor size (per increase in category) | -                   | -           | -       | 2.65                  | 1.31 – 5.33 | 0.007   |
| Posterior fossa location              | -                   | -           | -       | 1.13                  | 0.14 – 9.11 | 0.908   |

This online supplementary document is part of the article “Repeated craniotomies for intracranial tumors: is the risk increased? Pooled analysis of two prospective, institutional registries of complications and outcomes” by Costanza Maria Zattra<sup>1,2</sup>, MD; David Y. Zhang<sup>1</sup>, MSc; Morgan Broggi<sup>2</sup>, MD, PhD; Julia Velz<sup>1</sup>, MD; Flavio Vasella<sup>1</sup>, MD; Dominik Seggewiss<sup>1</sup>, MD; Silvia Schiavolin<sup>3</sup>, PsyD; Oliver Bozinov<sup>1</sup>, MD; Niklaus Kraysenbühl<sup>1</sup>, MD; Johannes Sarnthein<sup>1</sup>, PhD; Paolo Ferrolli<sup>2</sup>, MD; Luca Regli<sup>1</sup>, MD; Martin N. Stienen<sup>1</sup>, MD, FEBNS

<sup>1</sup>Department of Neurosurgery, University Hospital Zurich and Clinical Neuroscience Center, University of Zurich, Frauenklinikstrasse 10, 8091 Zurich, Switzerland

<sup>2</sup>Neurosurgical Unit 2, Department of Neurosurgery, Fondazione IRCCS Istituto Neurologico Carlo Besta, Milan, Italy

<sup>3</sup>Public Health and Disability Unit, Department of Neurology, Fondazione IRCCS Istituto Neurologico Carlo Besta, Milan, Italy

**Correspondence to:**

Martin N. Stienen, MD / FEBNS

Department of Neurosurgery

University Hospital Zurich & Clinical Neuroscience Center

University of Zurich

Frauenklinikstrasse 10

8091 Zurich, Switzerland

Tel: +41 – (0)44 – 255 – 1111

Email: [mnstienen@gmail.com](mailto:mnstienen@gmail.com)
