# Supplementary material for: Repeated craniotomies for intracranial tumors: is the risk increased? Pooled analysis of two prospective, institutional registries of complications and outcomes
Source: Springer Nature journal article supplement (doi:10.1007/s11060-018-03058-y), 2018-11-24
Supplement: MOESM2 [file 16292948]

**Online Resource 1:** According to the Clavien-Dindo Grade (CDG),<sup>[10]</sup> complications are classified into five grades based on the treatment required to manage them:

- I) Any deviation from the normal course, but not requiring any intervention (other than anti-emetics, antipyretics, analgesics, diuretics, electrolytes and physical therapy)
- II) Any deviation requiring pharmacological treatment other than that of grade I and/or transfusions and/or total parenteral nutrition
- III) Complications requiring surgical, endoscopic or radiological intervention (3a= not under general anesthesia; 3b=under general anesthesia)
- IV) Life-threatening complications requiring Intensive Care Unit management (4a=single organ dysfunction; 4b=multi-organ dysfunction)
- V) Complications causing death of the patient within 30 days of surgery.

This online supplementary document is part of the article “Repeated craniotomies for intracranial tumors: is the risk increased? Pooled analysis of two prospective, institutional registries of complications and outcomes” by Costanza Maria Zattra<sup>1,2</sup>, MD; David Y. Zhang<sup>1</sup>, MSc; Morgan Broggi<sup>2</sup>, MD, PhD; Julia Velz<sup>1</sup>, MD; Flavio Vasella<sup>1</sup>, MD; Dominik Seggewiss<sup>1</sup>, MD; Silvia Schiavolin<sup>3</sup>, PsyD; Oliver Bozinov<sup>1</sup>, MD; Niklaus Krayenbühl<sup>1</sup>, MD; Johannes Sarnthein<sup>1</sup>, PhD; Paolo Ferroli<sup>2</sup>, MD; Luca Regli<sup>1</sup>, MD; Martin N. Stienen<sup>1</sup>, MD, FEBNS

<sup>1</sup>Department of Neurosurgery, University Hospital Zurich and Clinical Neuroscience Center, University of Zurich, Frauenklinikstrasse 10, 8091 Zurich, Switzerland

<sup>2</sup>Neurosurgical Unit 2, Department of Neurosurgery, Fondazione IRCCS Istituto Neurologico Carlo Besta, Milan, Italy

<sup>3</sup>Public Health and Disability Unit, Department of Neurology, Fondazione IRCCS Istituto Neurologico Carlo Besta, Milan, Italy

**Correspondence to:**

Martin N. Stienen, MD / FEBNS

Department of Neurosurgery

University Hospital Zurich & Clinical Neuroscience Center

University of Zurich

Frauenklinikstrasse 10

8091 Zurich, Switzerland

Tel: +41 – (0)44 – 255 – 1111

Email: [mnstienen@gmail.com](mailto:mnstienen@gmail.com)
