# Supplementary material for: Repeated craniotomies for intracranial tumors: is the risk increased? Pooled analysis of two prospective, institutional registries of complications and outcomes
Source: Springer Nature journal article supplement (doi:10.1007/s11060-018-03058-y), 2018-11-24
Supplement: MOESM5 [file 16292948]

**Online Resource 4:** Subgroup analysis on patients undergoing microsurgical resection of a cerebral metastasis. The data is based on 357 patients, of which 47 underwent repeated surgery.

Logistic regression analysis estimating the relationship between repeated microsurgical resection of a cerebral metastasis and morbidity three months after surgery. The multivariate analysis is adjusted for baseline differences in age, sex, size and posterior fossa location of the tumor.

| M3 morbidity                          | Univariate analysis |             |         | Multivariate analysis |             |         |
|---------------------------------------|---------------------|-------------|---------|-----------------------|-------------|---------|
|                                       | OR                  | 95% CI      | p-value | OR                    | 95% CI      | p-value |
| Repeated surgery                      | 1.40                | 0.69 – 2.86 | 0.355   | 1.60                  | 0.77 – 3.34 | 0.207   |
| Age (per year)                        | -                   | -           | -       | 1.01                  | 0.98 – 1.03 | 0.540   |
| Male sex                              | -                   | -           | -       | 1.84                  | 1.08 – 3.14 | 0.026   |
| Tumor size (per increase in category) | -                   | -           | -       | 1.21                  | 0.72 – 2.01 | 0.475   |
| Posterior fossa location              | -                   | -           | -       | 1.38                  | 0.74 – 2.55 | 0.311   |

Logistic regression analysis estimating the relationship between repeated microsurgical resection of a cerebral metastasis and morbidity at time of hospital discharge. The multivariate analysis is adjusted for baseline differences in age, sex, size and posterior fossa location of the tumor.

| Discharge morbidity                   | Univariate analysis |             |         | Multivariate analysis |             |         |
|---------------------------------------|---------------------|-------------|---------|-----------------------|-------------|---------|
|                                       | OR                  | 95% CI      | p-value | OR                    | 95% CI      | p-value |
| Repeated surgery                      | 1.74                | 0.67 – 4.52 | 0.253   | 1.53                  | 0.57 – 4.09 | 0.401   |
| Age (per year)                        | -                   | -           | -       | 1.02                  | 0.99 – 1.06 | 0.243   |
| Male sex                              | -                   | -           | -       | 1.10                  | 0.51 – 2.39 | 0.809   |
| Tumor size (per increase in category) | -                   | -           | -       | 0.62                  | 0.29 – 1.30 | 0.204   |
| Posterior fossa location              | -                   | -           | -       | 0.56                  | 0.18 – 1.69 | 0.301   |

Logistic regression analysis estimating the relationship between repeated microsurgical resection of a cerebral metastasis and mortality three months after surgery. The multivariate analysis is adjusted for baseline differences in age, sex, size and posterior fossa location of the tumor.

| M3 mortality                          | Univariate analysis |             |         | Multivariate analysis |             |         |
|---------------------------------------|---------------------|-------------|---------|-----------------------|-------------|---------|
|                                       | OR                  | 95% CI      | p-value | OR                    | 95% CI      | p-value |
| Repeated surgery                      | 0.59                | 0.20 – 1.74 | 0.342   | 0.66                  | 0.22 – 1.98 | 0.462   |
| Age (per year)                        | -                   | -           | -       | 1.02                  | 0.99 – 1.05 | 0.133   |
| Male sex                              | -                   | -           | -       | 1.58                  | 0.83 – 3.00 | 0.164   |
| Tumor size (per increase in category) | -                   | -           | -       | 0.93                  | 0.50 – 1.75 | 0.833   |
| Posterior fossa location              | -                   | -           | -       | 1.75                  | 0.86 – 3.56 | 0.125   |

This online supplementary document is part of the article “Repeated craniotomies for intracranial tumors: is the risk increased? Pooled analysis of two prospective, institutional registries of complications and outcomes” by Costanza Maria Zattra<sup>1,2</sup>, MD; David Y. Zhang<sup>1</sup>, MSc; Morgan Broggi<sup>2</sup>, MD, PhD; Julia Velz<sup>1</sup>, MD; Flavio Vasella<sup>1</sup>, MD; Dominik Seggewiss<sup>1</sup>, MD; Silvia Schiavolin<sup>3</sup>, PsyD; Oliver Bozinov<sup>1</sup>, MD; Niklaus Kraysenbühl<sup>1</sup>, MD; Johannes Sarnthein<sup>1</sup>, PhD; Paolo Ferrolì<sup>2</sup>, MD; Luca Regli<sup>1</sup>, MD; Martin N. Stienen<sup>1</sup>, MD, FEBNS

<sup>1</sup>Department of Neurosurgery, University Hospital Zurich and Clinical Neuroscience Center, University of Zurich, Frauenklinikstrasse 10, 8091 Zurich, Switzerland

<sup>2</sup>Neurosurgical Unit 2, Department of Neurosurgery, Fondazione IRCCS Istituto Neurologico Carlo Besta, Milan, Italy

<sup>3</sup>Public Health and Disability Unit, Department of Neurology, Fondazione IRCCS Istituto Neurologico Carlo Besta, Milan, Italy

**Correspondence to:**

Martin N. Stienen, MD / FEBNS

Department of Neurosurgery

University Hospital Zurich & Clinical Neuroscience Center

University of Zurich

Frauenklinikstrasse 10

8091 Zurich, Switzerland

Tel: +41 – (0)44 – 255 – 1111

Email: [mnstienen@gmail.com](mailto:mnstienen@gmail.com)
