# Supplementary material for: Repeated craniotomies for intracranial tumors: is the risk increased? Pooled analysis of two prospective, institutional registries of complications and outcomes
Source: Springer Nature journal article supplement (doi:10.1007/s11060-018-03058-y), 2018-11-24
Supplement: MOESM6 [file 16292948]

**Online Resource 5:** Logistic regression analysis estimating the relationship between repeated microsurgical resection of an intracranial tumor and mortality three months after surgery. The multivariable analysis is adjusted for baseline differences in age, sex, histological diagnosis, size and posterior fossa location of the tumor.

| M3 mortality                          | Univariable analysis |             |         | Multivariable analysis |             |         |
|---------------------------------------|----------------------|-------------|---------|------------------------|-------------|---------|
|                                       | OR                   | 95% CI      | p-value | aOR                    | 95% CI      | p-value |
| Repeated surgery                      | 0.98                 | 0.58 – 1.65 | 0.936   | 1.32                   | 0.77 – 2.29 | 0.307   |
| Age (per year)                        | -                    | -           | -       | 1.05                   | 1.03 – 1.06 | <0.001  |
| Male sex                              | -                    | -           | -       | 1.14                   | 0.74 – 1.74 | 0.547   |
| Tumor size (per increase in category) | -                    | -           | -       | 1.62                   | 1.10 – 2.38 | 0.014   |
| Histology                             | -                    | -           | -       | 1.11                   | 1.04 – 1.18 | 0.002   |
| Posterior fossa location              | -                    | -           | -       | 1.47                   | 0.88 – 2.46 | 0.138   |

This online supplementary document is part of the article “Repeated craniotomies for intracranial tumors: is the risk increased? Pooled analysis of two prospective, institutional registries of complications and outcomes” by Costanza Maria Zattra<sup>1,2</sup>, MD; David Y. Zhang<sup>1</sup>, MSc; Morgan Broggi<sup>2</sup>, MD, PhD; Julia Velz<sup>1</sup>, MD; Flavio Vasella<sup>1</sup>, MD; Dominik Seggewiss<sup>1</sup>, MD; Silvia Schiavolin<sup>3</sup>, PsyD; Oliver Bozinov<sup>1</sup>, MD; Niklaus Krayenbühl<sup>1</sup>, MD; Johannes Sarnthein<sup>1</sup>, PhD; Paolo Ferroli<sup>2</sup>, MD; Luca Regli<sup>1</sup>, MD; Martin N. Stienen<sup>1</sup>, MD, FEBNS

<sup>1</sup>Department of Neurosurgery, University Hospital Zurich and Clinical Neuroscience Center, University of Zurich, Frauenklinikstrasse 10, 8091 Zurich, Switzerland

<sup>2</sup>Neurosurgical Unit 2, Department of Neurosurgery, Fondazione IRCCS Istituto Neurologico Carlo Besta, Milan, Italy

<sup>3</sup>Public Health and Disability Unit, Department of Neurology, Fondazione IRCCS Istituto Neurologico Carlo Besta, Milan, Italy

**Correspondence to:**

Martin N. Stienen, MD / FEBNS

Department of Neurosurgery

University Hospital Zurich & Clinical Neuroscience Center

University of Zurich

Frauenklinikstrasse 10

8091 Zurich, Switzerland

Tel: +41 – (0)44 – 255 – 1111

Email: [mnstienen@gmail.com](mailto:mnstienen@gmail.com)
